# Supplementary material for: Ankle sprain as a work-related accident: status of proprioception after 2 weeks
Source: PeerJ. 2017 Dec 15;5:e4163. doi: 10.7717/peerj.4163 (PMC5733905; doi:10.7717/peerj.4163)
Supplement: Supplemental Information 1 [file peerj-05-4163-s001.xlsx]

## Sheet: Hoja 1
Tabla 1
Subject	Ankle Sparin Level	Test Date	Gender	Age	Birth Date	Dominant laterality	Weight	Height	State	Laterality Tested	Open Eyes Final evaluation	Rombert Open Eyes evaluation	Rombert Open Eyes % test timing	Rombert Open Eyes medio-leteral dispersion (mm)	Rombert Open Eyes antero-posterior dispersion (mm)	Rombert Open Eyes medio-lateral desplacement (mm)	%	Rombert Open Eyes antero-posterior desplacement (mm)	%	Romber Open Eyes confidence surface (mm2)	%	Romber Open Eyes Speed. Percentile 75 (mm/s)	%	Rombert Open Eyes ML Osicllation Frequency (Hz)	%	Rombert Open Eyes AP Osicllation Frequency	%	Rombert Open Eyes Foam Valoration	Rombert Open Eyes Foam % test timing	Rombert Open Eyes Foam ML Dispersion (mm)	Rombert Open Eyes Foam AP Dispersion (mm)	Rombert Open Eyes Foam ML Desplacement (mm)	%	Rombert Open Eyes Foam AP desplacement (mm)	%	Rombert Open Eyes Foam Confidence Area (mm2)	%	Rombert Open Eyes Foam Speed Percentile 75 (mm/s)	%	Rombert Open Eyes Foam ML oscillation frequency (Hz)	%	Rombert Open Eyes Foam AP oscillation frequency (Hz)	%	Closed Eyes valoration		Rombert Closed Eyes Valoration % test timing	Rombert Closed Eyes Valoration ML Dispersion (mm)	Rombert Closed Eyes Valoration AP Dispersion (mm)	Rombert Closed Eyes Valoration ML Desplacement (mm)
2		2012-02-02	Masculino	40	1971-04-07	Right handed	84.6	177	Healthy	Right	0.99	0.99	100	5.87	7.87	29.92	0.99	38.31	1	879.25	0.97	71.5	1	4.8	0.97	3.95	1	0.98	100	6.39	7.77	29.2	1	36.17	1	922.78	1	65.35	1	4.38	0.91	2.95	0.98	0.7	0.59	76.67	14.57	18.75	62.42
2	1	2012-02-02	Masculino	40	1971-04-07	Right handed	84.6	177	Injured	Left	0.99	1	100	4.18	6.18	20.94	1	29.68	1	484.62	1	63.01	1	6.18	1	3.29	0.99	0.99	100	5.52	7.45	25.07	1	40.16	0.99	773.28	1	73.13	1	5.05	0.95	4.09	0.98	0.18	0.17	18.67	12.56	9.27	72.86
3	1	2012-02-03	Masculino	24	1987-10-07	Right handed	72.3	181	Injured	Right	0.81	0.75	100	18.21	23.11	88.86	0.69	96.3	0.68	8620.54	0.41	97.26	0.9	4.29	0.86	3.6	0.97	0.87	100	9.1	11.48	38.02	0.97	56.64	0.93	1893.66	0.52	99.08	0.88	4.59	0.9	3.76	1	0.65	0.68	87.33	13.16	15.99	48.55
3		2012-02-03	Masculino	24	1987-10-07	Right handed	72.3	181	Healthy	Left	0.91	0.92	100	7.29	8.99	36.42	0.97	48.48	0.95	1217.14	0.71	97.22	0.9	6.16	1	4.29	1	0.9	100	8.98	8.58	41.3	0.95	51.86	0.96	1433.95	0.64	108.96	0.83	5.58	1	4.39	1	0.74	0.71	100	15.82	16.87	61.42
4	2	2012-02-06	Masculino	37	1974-10-21	Right handed	103.4	188	Injured	Right	0.99	0.98	100	7.62	7.51	33.07	1	40.7	1	1055.99	0.96	91.93	1	5.81	0.93	4.9	1	1	100	6.22	6.55	28.4	1	36.4	1	726.91	1	69.62	1	5.37	1	4.39	1	0.45	0.56	74.67	13.83	17.47	46.85
4		2012-02-06	Masculino	37	1974-10-21	Right handed	103.4	188	Healthy	Left	0.98	0.97	100	7.79	8.63	34.18	1	46.29	0.97	1242.2	0.86	90.45	1	5.71	1	4.46	1	0.99	100	6.66	7.65	32.03	1	38.72	1	946.35	1	75.81	1	4.97	0.93	4.29	1	0.35	0.37	49.33	12.33	16.99	41.76
5		2012-02-10	Femenino	27	1984-09-11	Right handed	70.88	162	Healthy	Right	0.97	0.95	100	5.56	6.51	27.21	1	29.28	1	683.15	0.97	47.67	1	3.75	0.9	2.16	0.85	1	100	5.63	4.83	23.77	1	24.47	1	521.58	1	49.55	1	4.27	0.98	3.26	1	0.85	0.85	100	10.07	11.47	40.22
5	1	2012-02-10	Femenino	27	1984-09-11	Right handed	70.88	162	Injured	Left	0.97	0.96	100	5.91	6.91	25.07	1	36.84	0.97	754.94	0.96	52.24	1	3.59	0.87	2.87	0.95	0.99	100	5.33	6.31	26.11	1	35.33	0.99	604.69	1	53.5	1	4.74	1	3.16	0.94	0.86	0.9	100	7.95	11.17	33.59
6	1	2012-02-16	Femenino	31	1981-01-19	Right handed	59.32	159	Injured	Right	0.98	0.98	100	3.78	4.68	18.79	1	22.79	1	334.14	1	46.89	1	4.67	0.89	3.07	0.97	0.98	100	4.07	4.64	19.74	1	22.54	1	346.02	1	49.39	1	4.43	0.91	3.44	0.98	0.64	0.93	100	7.68	10.19	31.75
6		2012-02-16	Femenino	31	1981-01-19	Right handed	59.32	159	Healthy	Left	0.97	0.97	100	4.41	5.96	20.7	1	25.94	1	463.31	1	53.63	1	4.33	0.91	2.45	0.89	0.98	100	4.58	5.03	20.17	1	27.43	1	428.94	1	49.92	1	3.59	0.9	2.52	0.97	0.44	0.64	70.67	9.23	9.04	36.48
7	1	2012-02-17	Femenino	27	1984-03-21	Right handed	54	161	Injured	Right	0.99	0.99	100	4.35	6.06	23.51	1	30.04	1	474.73	100	62	1	6.07	1	3.9	0.92	1	100	4.57	6.44	21.73	1	35.34	1	565.03	1	62.45	1	5.72	1	3.41	1	0.56	0.8	98.33	11.93	12.09	42.58
7		2012-02-17	Femenino	27	1984-03-21	Right handed	54	161	Healthy	Left	1	1	100	3.37	6.38	16.63	1	29.28	1	402.79	1	60.29	1	6.16	1	2.82	1	1	100	3.39	4.7	18.68	1	24.66	1	292.64	1	63.26	1	6.79	1	5.99	1	0.72	0.84	100	8.17	12.5	35.89
8		2012-03-27	Masculino	32	1979-10-24	Right handed	84.83	170	Healthy	Right	0.97	0.98	100	5.22	7.16	25.12	1	33.46	1	677.6	1	55.47	1	4.23	0.91	3.08	0.97	0.96	100	5.63	7.63	26.23	1	36.03	1	761.59	1	62.37	1	4.38	0.94	2.53	0.81	0.62	0.71	93.33	13.22	13.88	48.37
8	1	2012-03-27	Masculino	32	1979-10-24	Right handed	84.83	170	Injured	Left	0.99	0.99	100	5.61	7.22	28.21	1	34.69	1	764.05	1	61.06	1	4.65	0.97	2.93	0.99	0.99	100	5.42	5.89	25.86	1	31.88	1	594.71	1	65.73	1	5.58	0.91	4.42	1	0.55	0.75	93.33	11.37	12.39	45
9	2	2012-05-02	Masculino	26	1985-02-14	Right handed	67.2	174	Injured	Right	0.99	0.99	100	6.14	6.67	29.78	0.99	41.75	0.98	752.76	0.99	72.54	1	4.28	0.97	5.11	1	0.99	100	5.22	6.04	22.96	1	34.95	1	557.07	1	64.68	1	4.17	0.94	3.94	1	0.37	0.4	49.67	9.5	17.66	32.63
9		2012-05-02	Masculino	26	1985-02-14	Right handed	67.2	174	Healthy	Left	0.98	1	100	5.01	5.24	25.65	1	29.65	1	487.85	1	62.55	1	6.01	1	3.98	1	0.96	100	5.07	5.06	24.78	1	27.7	1	551.81	1	55.71	1	4.7	0.94	1.9	0.79	0.52	0.64	82.33	13.51	12.92	50.56
10		2012-05-02	Masculino	42	1969-09-15	Right handed	92.25	175	Healthy	Right	0.98	0.97	100	4.6	7.4	23.29	1	34.39	1	602.4	1	55.47	1	5.01	0.96	2.82	0.85	0.99	100	4.9	5.1	24.95	1	28.75	1	459.56	1	56.05	1	5.12	0.94	3.99	1	0.77	0.87	100	10.62	12.04	44.08
10	2	2012-05-02	Masculino	42	1969-09-15	Right handed	92.25	175	Injured	Left	0.98	0.96	100	6.87	7.41	28.75	1	38.87	1	939.92	1	64.46	1	4.51	0.91	3.1	0.89	1	100	6.23	6.18	29.61	1	32.1	1	716.55	1	71.08	1	6.11	1	4.85	1	0.53	0.43	49.33	10.12	11.58	38.11
11		2012-05-15	Femenino	26	1985-07-12	Right handed	75.85	164	Healthy	Right	0.92	0.93	100	4.76	7.93	22	1	34.25	1	697.72	0.99	47.55	1	3.96	0.89	1.56	0.69	0.91	100	6.51	7.37	28.27	1	32.38	1	924.47	0.87	54.76	1	3.34	0.83	2.29	0.78	0.59	0.65	85	12.77	15.79	48.31
11	1	2012-05-15	Femenino	26	1985-07-12	Right handed	75.85	164	Injured	Left	0.93	0.96	100	6.21	7.34	30.96	1	36.6	0.97	847.92	0.93	54.92	1	3.6	0.9	2.58	0.97	0.91	100	6.88	8.12	29.76	1	40.23	0.96	1020.43	0.84	52.79	1	3.06	0.8	2.16	0.85	0.51	0.47	60.67	12.13	14.05	42.29
12		2012-06-08	Masculino	36	1976-02-11	Right handed	101.9	174	Healthy	Right	0.98	0.96	100	4.81	7.4	23.12	1	34.72	1	656.24	1	53.54	1	5.79	1	2.73	0.76	1	100	4.41	7.33	22.98	1	35.83	1	605.65	1	55.2	1	5.85	1	3.15	1	0.65	0.73	87.67	10.84	14.39	39.6
12	1	2012-06-08	Masculino	36	1976-02-11	Right handed	101.9	174	Injured	Left	0.99	0.99	100	5.05	7.86	23.58	1	38.14	0.99	720.7	1	56.66	1	4.87	1	3.2	0.96	0.99	100	4.95	7.17	25	1	33.82	1	664.8	1	58.12	1	5.47	1	2.8	0.94	0.46	0.35	46.33	12.84	19.11	44.02
13	1	2012-06-11	Femenino	32	1979-08-03	Right handed	49.41	153	Injured	Right	0.99	0.99	100	4.2	6.24	20.71	1	31.42	1	476.05	1	57.93	1	5.15	1	2.58	0.94	0.99	100	4.17	5.52	21.98	1	26.37	1	413.99	1	57.94	1	5.62	1	3.29	0.96	0.86	0.88	100	9.28	11.18	38.76
13		2012-06-11	Femenino	32	1979-08-03	Right handed	49.41	153	Healthy	Left	1	1	100	3.76	5.61	19.2	1	27.5	1	387.89	1	58.01	1	5.37	1	3.52	1	1	100	4.32	6.23	21.18	1	30.2	1	499.48	1	59.28	1	5.21	1	3.67	1	0.9	0.9	100	8.84	9.83	36.8
14		2013-02-07	Masculino	39	1973-12-23	Left handed	97.79	184	Healthy	Right	0.98	0.99	100	6.27	7.4	28.97	1	37.39	1	846.09	1	86.54	1	5.7	1	3.94	0.95	0.97	100	6.7	8.97	32.02	1	45.06	0.98	1121.11	0.92	99.44	0.98	7.83	1	3.04	0.97	0.67	0.85	100	11.82	10	47.05
14	1	2013-02-07	Masculino	39	1973-12-23	Left handed	97.79	184	Injured	Left	0.98	0.96	100	5.62	7.57	29.74	1	38.05	1	766.85	1	85.02	1	7.15	1	2.63	0.76	1	100	5.5	6.14	27.54	1	32.41	1	634.96	1	88.31	0.98	7.46	1	5.15	1	0.79	0.85	100	11.14	11.36	44.21
15	1	2013-02-27	Masculino	42	1970-04-03	Right handed	112.2	170	Injured	Right	0.98	0.99	100	4.69	6.54	23.68	1	36.68	1	566.81	1	71.67	1	7.33	1	3.6	0.93	0.97	100	5.73	8.28	26.04	1	41.76	1	876.85	1	69.7	1	5.9	1	2.75	0.8	0.8	0.87	100	10.24	12.21	43.23
15		2013-02-27	Masculino	42	1970-04-03	Right handed	112.2	170	Healthy	Left	0.98	0.98	100	5.03	5.88	26.46	1	27.5	1	539.21	1	59.65	1	7.01	1	3.37	0.86	0.99	100	5.48	6.84	28.8	1	31.59	1	698.21	1	62.48	1	6.08	1	3.08	0.92	0.82	0.88	100	9.75	11.65	46.68
16	1	2013-05-14	Femenino	49	1963-12-31	Right handed	64.95	166	Injured	Right	0.99	1	100	5.6	6.97	24.69	1	38.03	1	735.1	1	71.29	1	5.37	1	3.81	1	0.99	100	6.43	7.98	31.74	1	40.52	0.99	937.68	1	73.63	1	5.16	0.93	3.46	1	0.5	0.52	80	24.81	16.56	98.71
16		2013-05-14	Femenino	49	1963-12-31	Right handed	64.95	166	Healthy	Left	1	1	100	5.41	6.22	25.61	1	36.67	1	621.02	1	78.55	1	6.03	1	4.38	1	1	100	6.07	7.18	30.3	1	35.23	1	800.98	1	79.24	1	5.47	1	3.4	1	0.71	0.9	100	11.27	9.59	43.62
17	2	2013-05-15	Masculino	31	1982-04-10	Right handed	79.78	176	Injured	Right	0.99	0.97	100	5.6	9.06	22.58	1	40.53	0.99	881.04	0.94	74.97	1	4.78	0.99	3.33	0.91	1	100	4.29	5.35	20.56	1	27.2	1	424.04	1	61.1	1	5.14	1	4.23	1	0.24	0.27	31.33	6.11	16.09	22.84
17		2013-05-15	Masculino	31	1982-04-10	Right handed	79.78	176	Healthy	Left	1	1	100	3.93	6.8	20.03	1	39.6	0.97	490.79	1	70.22	1	5.86	1	4.95	1	1	100	4.64	5.34	22.39	1	27.8	1	447.98	1	64.95	1	5.71	1	4.41	1	0.61	0.71	98.67	10.04	14.87	40.16
18	1	2013-05-20	Femenino	30	1982-08-06	Right handed	59.2	170	Injured	Right	0.95	0.96	100	6.61	7.62	30.39	1	38.19	0.99	960.01	0.9	70.75	1	3.79	0.89	3.79	1	0.93	100	6.41	9.75	29.6	1	53.71	0.92	1132.98	0.81	73.79	1	4.45	0.95	2.6	0.91	0.74	0.82	100	10.46	11.42	41.14
18		2013-05-20	Femenino	30	1982-08-06	Right handed	59.2	170	Healthy	Left	0.98	0.99	100	5.81	6.38	27.82	1	31.97	1	688.99	1	60.65	1	4.11	0.92	2.96	1	0.98	100	6.16	7.28	29.19	1	34.36	1	805.44	0.95	60.83	1	3.64	0.94	2.97	1	0.79	0.79	100	12.3	12.51	49.36
19	1	2013-06-26	Masculino	37	1975-12-02	Right handed	78.1	168	Lesionado	Right	0.99	0.99	100	6.13	7.33	27.53	1	38.08	1	847.57	0.99	71.03	1	4.59	0.99	3.79	1	0.99	100	6.42	8.9	30.67	1	47.15	0.98	1037.33	0.98	73.71	1	4.83	1	3.11	1	0.5	0.671667	90	18.34	14.23	70.34
19		2013-06-26	Masculino	37	1975-12-02	Right handed	78.1	168	Healthy	Left	1	1	100	5.6	6.28	26.75	1	34.5	1	654.99	1	69.59	1	5.08	1	3.69	1	1	100	6.15	7.21	29.77	1	34.02	1	803.29	1	70.11	1	4.65	1	3.22	1	0.62	0.848333	100	11.87	11.13	46.51
20		2013-09-12	Masculino	31	1981-11-13	Right handed	71.1	165	Healthy	Right	0.987778	0.988333	100	5.01	7.57	23.52	1	33.95	1	687.65	1	51.49	1	4.12	0.93	2.29	1	0.986667	100	6.06	7.49	27.24	1	34.24	1	843.05	1	58.55	1	3.88	0.94	2.4	0.98	0.656667	0.703333	89.55	12.995	14.835	48.34
20	1	2013-09-12	Masculino	31	1981-11-13	Right handed	71.1	165	Lesionado	Left	0.989167	0.985	100	5.89	7.26	29.67	1	35.57	1	806.04	0.99	58.03	1	4.11	0.92	2.77	1	0.993333	100	6.16	6.99	27.8	1	36.07	1	807.61	1	59.23	1	4.34	0.96	3.28	1	0.539167	0.538333	77.1	11.75	13.22	43.645
21	2	2013-10-18	Femenino	40	1973-01-12	Right handed	55.2	162	Lesionado	Right	0.991667	0.986667	100	6.87	7.07	31.32	1	41.41	0.97	904.31	0.96	82.27	1	5.01	0.99	5.02	1	0.996667	100	5.73	6.31	25.64	1	35.71	1	642.01	1	67.18	1	4.81	1	4.18	0.98	0.675	0.686667	62.16	11.665	17.565	39.74
21		2013-10-18	Femenino	40	1973-01-12	Right handed	55.2	162	Healthy	Left	1	1	100	6.41	6.97	29.91	1	37.89	1	865.09	1	76.53	1	5.81	1	4.23	1	1	100	5.85	6.38	28.41	1	33.23	1	748.99	1	65.79	1	4.85	1	3.11	1	0.735833	0.775	65.85	12.92	14.955	46.16
22	1	2013-11-14	Femenino	31	1982-04-12	Right handed	50.7	164	Injured	Right	1	1	100	4.13	5.36	21.17	1	26.5	1	404.51	1	54.47	1	5.47	1	3.5	1	1	100	4.34	5.56	20.77	1	28.98	1	455.53	1	56.01	1	5.09	1	3.44	1	0.67	0.848333	99.17	9.805	11.14	37.165
22		2013-11-14	Femenino	31	1982-04-12	Right handed	50.7	164	Healthy	Left	1	1	100	3.86	6.18	18.66	1	27.63	1	433.11	1	56.99	1	5.27	1	2.65	1	1	100	4.01	4.85	19.49	1	26.07	1	360.83	1	57.61	1	5.21	1	4.27	1	0.734167	0.896667	85.34	8.7	10.77	36.185
23	2	2014-01-22	Male	35	1978-04-30	Right handed	103.4	173	Injured	Right	0.895833	0.841667	100	13.015	15.21	61.065	0.7	68.4	0.75	4838.37	0.65	94.495	0.95	5.15	1	4.15	1	0.95	100	7.56	9.115	33.11	1	46.62	0.99	1310.18	0.71	84.45	1	4.88	1	4.175	1	0.65	0.735	80.9	13.595	16.63	47.8
23		2014-01-22	Male	35	1978-04-30	Right handed	103.4	173	Healthy	Left	0.966667	0.958333	100	7.64	8.71	35.4	0.97	47.285	0.97	1229.77	0.86	93.735	0.95	6.035	1	4.275	1	0.975	100	7.72	8.215	36.565	1	45.39	0.99	1190.05	0.86	92.485	1	5.175	1	4.44	1	0.698333	0.738333	74.565	14.175	16.83	51.69
24	1	2014-02-04	Female	26	1987-03-05	Right handed	58.2	164	Injured	Right	0.998333	1	100	4.375	6.46	22.125	1	34.12	1	521.36	1	64.87	1	6.17	1	3.16	1	0.996667	100	5.02	6.83	24.08	1	33.995	1	645.49	1	63.75	1	5.83	1	2.95	0.98	0.731667	0.831667	100	9.69	11.765	40.925
24		2014-02-04	Female	26	1987-03-05	Right handed	58.2	164	Healthy	Left	1	1	100	4.325	5.815	22.76	1	27.57	1	463.48	1	58.9	1	6.12	1	3.515	1	1	100	4.97	6.465	25.06	1	30.825	1	598.915	1	60.81	1	5.715	1	3.305	1	0.798333	0.865	100	9.225	10.81	41.67
25		2014-02-26	Female	40	1973-09-29	Left handed	59.8	157	Healthy	Right	0.996667	0.998333	100	5.065	7.23	24.17	1	34.04	1	666.97	1	54.455	1	5.06	1	2.855	0.99	0.995	100	4.97	7.53	24.555	1	35.98	1	683.57	1	58.835	1	5.065	1	2.89	0.97	0.699167	0.758333	90.45	12.08	14.085	44.035
25	1	2014-02-26	Female	40	1973-09-29	Left handed	59.8	157	Injured	Left	0.995	0.99	100	5.38	7.49	25.945	1	36.365	1	742.425	1	58.81	1	4.81	0.97	3.015	0.97	1	100	5.135	6.58	25.38	1	32.9	1	629.705	1	61.975	1	5.475	1	3.66	1	0.561667	0.603333	69.78	12.155	15.7	44.56
26		2014-03-11	Male	20	1993-09-21	Right handed	73.1	174	Healthy	Right	0.986667	0.978333	100	5.67	7.515	26.275	1	35.7	1	766.9	1	69.045	1	4.94	0.98	3.145	0.89	0.995	100	6.41	8.26	29.66	1	39.68	1	982.11	1	79.025	1	5.885	1	2.75	0.97	0.65	0.711667	94.805	12.4375	12.4475	47.725
26	1	2014-03-11	Male	20	1993-09-21	Right handed	73.1	174	Injured	Left	0.9875	0.975	100	5.785	7.445	29.735	1	36.84	1	786.475	1	71.555	1	5.66	1	2.73	0.85	1	100	5.86	6.595	27.7	1	34.27	1	721.315	1	73.8	1	5.93	1	4.245	1	0.611667	0.676667	88.58	11.475	12.32	43.9575
27		2014-03-28	Male	45	1968-11-24	Right handed	85.3	169	Healthy	Right	0.985833	0.995	100	6.03	7.675	29.405	1	37.89	1	862.63	0.97	79.06	1	5.21	1	3.985	1	0.976667	100	6.585	8.33	30.65	1	40.575	0.99	1021.99	0.87	82.355	1	6.145	1	2.955	1	0.645	0.653333	88.375	13.155	14.415	54.695
27	2	2014-03-28	Male	45	1968-11-24	Right handed	85.3	169	Injured	Left	0.998333	0.998333	100	4.86	6.915	25.3	1	33.905	1	625.695	1	74.055	1	6.625	1	3	0.99	0.998333	100	5.55	6.755	26.345	1	36.245	1	704.16	0.99	80.68	1	6.295	1	4.58	1	0.453333	0.48	59.375	11.81	10.355	58.495
28	1	2014-04-22	Female	36	1977-08-04	Right handed	63	166	Injured	Right	0.895833	0.841667	100	12.995	15.23	61.045	0.7	68.42	0.75	4838.35	0.65	94.515	0.95	5.13	1	4.17	1	0.95	100	7.58	9.095	33.13	1	46.6	0.99	1310.2	0.71	84.43	1	4.9	1	4.155	1	0.683333	0.801667	80.92	13.575	16.65	47.78
28		2014-04-22	Female	36	1977-08-04	Right handed	63	166	Healthy	Left	0.966667	0.96	100	7.62	8.73	35.38	0.98	47.305	0.97	1229.75	0.86	93.755	0.95	6.015	1	4.295	1	0.973333	100	7.74	8.195	36.585	1	45.37	0.99	1190.07	0.86	92.465	0.99	5.195	1	4.42	1	0.700833	0.743333	74.585	14.155	16.85	51.67
29	1	2014-05-21	Male	49	1965-02-22	Right handed	97	175	Injured	Right	1	1	100	4.205	6.22	22.04	1	30.8	1	475.32	1	60.035	1	5.54	1	3.31	1	1	100	4.44	5.91	21.925	1	30.785	1	489.58	1	60.125	1	5.74	1	3.28	1	0.710833	0.881667	99.235	10.535	11.705	40.6
29		2014-05-21	Male	49	1965-02-22	Right handed	97	175	Healthy	Left	1	1	100	3.495	6.065	17.845	1	28.46	1	395.27	1	59.22	1	5.695	1	3.24	1	1	100	3.925	5.395	20	1	27.36	1	396.13	1	61.2	1	6.07	1	4.76	1	0.825833	0.926667	100	8.435	11.235	36.275
30		2014-06-17	Female	40	1974-05-16	Right handed	70	160	Healthy	Right	0.9925	0.985	100	5.02	7.015	25.19	1	31.895	1	642.715	1	51.63	1	4.32	0.92	2.55	0.99	1	100	5.325	4.905	24.42	1	26.55	1	490.63	1	52.74	1	4.755	1	3.565	1	0.810833	0.946667	100	10.285	11.815	42.09
30	2	2014-06-17	Female	40	1974-05-16	Right handed	70	160	Injured	Left	0.985	0.97	100	6.33	7.22	26.85	1	37.915	1	847.37	0.98	58.41	1	3.99	0.87	3.045	0.97	1	100	5.84	6.185	27.92	1	33.655	1	660.68	1	62.23	1	5.485	1	3.945	1	0.758333	0.866667	74.725	8.975	11.435	35.79
31		2014-06-27	Male	32	1981-12-30	Right handed	74	181	Healthy	Right	1	1	100	3.585	5.975	17.935	1	28.37	1	395.36	1	59.13	1	5.785	1	3.15	1	1	100	3.835	5.485	19.91	1	27.45	1	396.04	1	61.29	1	5.98	1	4.85	1	0.8525	0.943333	100	8.525	11.145	36.365
31	1	2014-06-27	Male	32	1981-12-30	Right handed	74	181	Injured	Left	0.993333	0.998333	100	5.765	7.26	27.065	1	35.405	1	761.865	1	70.985	1	4.985	0.99	3.49	1	0.988333	100	6.145	8.32	29.105	1	40.565	0.99	941.33	0.97	80.925	1	6.085	1	2.805	0.97	0.585833	0.721667	96.645	12.54	11.92	47.73
[truncated: 27 more columns]
